# Supplementary material for: Long-Term Impact of D2 Lymphadenectomy during Gastrectomy for Cancer: Individual Patient Data Meta-Analysis and Restricted Mean Survival Time Estimation
Source: MDPI journal article supplement (doi:10.3390/cancers16020424), 2024-01-19
Supplement: s1 [file s1]

Table S2. The GRADE certainty of evidence for OS, CSS, and DFS.

Author(s): Aiolfi A, et al  
Question:  
Setting:  
Bibliography:

| Certainty assessment |                   |              |               |              |             |                                                                                                                | № of patients |             | Effect            |                                             | Certainty        |
|----------------------|-------------------|--------------|---------------|--------------|-------------|----------------------------------------------------------------------------------------------------------------|---------------|-------------|-------------------|---------------------------------------------|------------------|
| № of studies         | Study design      | Risk of bias | Inconsistency | Indirectness | Imprecision | Other considerations                                                                                           | [intervento]  | [confronto] | Relative (95% CI) | Absolute (95% CI)                           |                  |
| 5                    | randomised trials | not serious  | not serious   | not serious  | not serious | all plausible residual confounding would reduce the demonstrated effect                                        |               |             | -                 | SMD 1.8 SD higher (4.2 lower to 0.7 higher) | ⊕⊕⊕⊕<br>High     |
| 3                    | randomised trials | not serious  | not serious   | not serious  | not serious | all plausible residual confounding would reduce the demonstrated effect                                        |               |             | -                 | SMD 1.2 SD higher (3.9 lower to 5.7 higher) | ⊕⊕⊕⊕<br>High     |
| 3                    | randomised trials | serious      | not serious   | not serious  | not serious | publication bias strongly suspected<br>all plausible residual confounding would reduce the demonstrated effect |               |             | -                 | SMD 0.8 SD higher (1.7 lower to 3.4 higher) | ⊕⊕⊕○<br>Moderate |

CI: confidence interval; SMD: standardised mean difference
