# Supplementary material for: Long-Term Impact of D2 Lymphadenectomy during Gastrectomy for Cancer: Individual Patient Data Meta-Analysis and Restricted Mean Survival Time Estimation
Source: Cancers (Basel). 2024 Jan 19;16(2):424. doi: 10.3390/cancers16020424 (PMC10814228; doi:10.3390/cancers16020424)
Supplement: Supplementary file 1 [file cancers-16-00424-s001.zip]

Archive with 7 entries (7 files):
- File S1.pdf
- Suppl Figure 1 - risk of bias def.tiff
- Suppl Figure 2 def - OS.tiff
- Suppl Figure 3 def - CSS.tiff
- Suppl Figure 4 def - DFS.tiff
- Suppl Table 1.pdf
- Suppl Table 2.pdf
